# Supplementary material for: The life in a gradient: calcium, the lncRNA SPRR2C and mir542/mir196a meet in the epidermis to regulate the aging process
Source: publisher site journal article supplement (doi:10.18632/aging.203385), 2021-08-02
Supplement: Supplementary file [file aging-v13i15-203385-supplementary-material-SD2.pdf]

## SUPPLEMENTARY TABLE

**Supplementary Table 1. Primer sequences for RT-PCR.**

|         |     |                                           |
|---------|-----|-------------------------------------------|
| ARP     | fwd | 5'-GGC ACC ATT GAA ATC CTG AGT GAT GTG-3' |
|         | rev | 5'-TTG CGG ACA CCC TCC AGG AAG C -3'      |
| EVPL    | fwd | 5'-AAG GAA CGG CTG AGC TAC AA-3'          |
|         | rev | 5'-AAA TAA CCA CCC GCA GTG TC-3'          |
| IVL     | fwd | 5'-AAA TAA CCA CCC GCA GTG TC-3'          |
|         | rev | 5'-ATC GCT CCT TTG CAC CTC TA-3'          |
| LCE1A   | fwd | 5'-CTG CAA GAG TGG CTG AGA TG-3'          |
|         | rev | 5'-GCA GGA AAT GAG CTG GAG AG-3'          |
| LCE2A   | fwd | 5'-CCC GAT TGT TGT GAG TGT GA-3'          |
|         | rev | 5'-AGA AAA AGG GGC AGG AGA AG-3'          |
| LCE2B   | fwd | 5'-CCG ACT GCT GTG AGA GTG AA-3'          |
|         | rev | 5'-AAG CCC CAT GAG TCT TTG TG-3'          |
| LCE3C   | fwd | 5'-AGT TGT CCC TCA CCC AAG TG-3'          |
|         | rev | 5'-ATT GAT GGG ACC TGA AGT GC-3'          |
| LCE6A   | fwd | 5'-TGA GGC ACA GGT GCA GTT TAC -3'        |
|         | rev | 5'-CTG AA GGG GTG AAT GGA AGA -3'         |
| LOR     | fwd | 5'-GGA GTT GGA GGT GTT TTC CA-3           |
|         | rev | 5'-ACT GGG GTT GGG AGG TAG TT-3'          |
| PPL     | fwd | 5'-TGG ATT GTG CTG CTG TTA GC-3'          |
|         | rev | 5'-GAC TCC AGC CAC CAG GTT TA-3'          |
| SPRR1B  | fwd | 5'-CAT TCT GTC TCC CCC AAA AA-3'          |
|         | rev | 5'-ATG GGG GTA TAA GGG AGC TG-3'          |
| SPRR2A  | fwd | 5'-CCT GAC AGC AAA AAG TTT CT-3'          |
|         | rev | 5'-AAA GGT GGT AGA AGC TCG-3'             |
| SPRR2B  | fwd | 5'-GCC AAA GTA TCC ACC GAA GA-3'          |
|         | rev | 5'-AAC ATC ATG GGC AGA TCA CA-3'          |
| SPRR2G  | fwd | 5'-TCC ACC ATG CCA GGA TAA AT-3'          |
|         | rev | 5'-GCT GAA GGG AAG ATG ATG GA-3'          |
| SPRR2E  | fwd | 5'-ATT GGC TCA CCT TGT TCC AC-3'          |
|         | rev | 5'-TGG GAA CTG ACA CTG CTG AG-3'          |
| SPRR2F  | fwd | 5'-TGA TAG CAA AAG GTT TTC TTT T-3'       |
|         | rev | 5'-TTA TTC AGG GAG TGA AAG GA-3'          |
| SPRR3   | fwd | 5'-TCA GCA GAA GAC CAA GCA GA-3'          |
|         | rev | 5'-GAG ACT ATG GCT TGG GGT GA-3'          |
| SPRR4   | fwd | 5'-CTC CTC CTG CCC AAG ATG TA-3'          |
|         | rev | 5'-TTC CTC ACT TTG GGA AAT GG-3'          |
| SPRR2C  | fwd | 5-AGC CAT CCA GGG ATA CAC AG-3'           |
|         | rev | 5'-CCG GTA CAG CTG AGG ACT TC-3'          |
| Renilla | fwd | 5'-TCG TCC ATG CTG AGA GTG TC-3'          |
|         | rev | 5'-CTC CAG TTT CCG CAT GAT CT-3'          |
| Firefly | fwd | 5'-TTC GCT AAG AGC ACC CTG AT-3'          |
|         | rev | 5'-GTA ATC AGA ATG GCG CTG GT-3'          |
